1 **Large-scale comparative small RNA analyses reveal genomic structural variants in driving**  
2 **expression dynamics and differential selection pressures on distinct small RNA classes**  
3 **during tomato domestication**

4  
5 You Qing<sup>1,2</sup>, Yi Zheng<sup>1,2,3,\*</sup>, Sizolwenkosi Mlotshwa<sup>4,10</sup>, Heather N. Smith<sup>5,11</sup>, Xin Wang<sup>3</sup>, Xuyang  
6 Zhai<sup>1,2</sup>, Esther van der Knaap<sup>6,7,8</sup>, Ying Wang<sup>4,5,\*</sup>, Zhangjun Fei<sup>3,9,\*</sup>

7  
8 <sup>1</sup>Beijing Key Laboratory for Agricultural Application and New Technique, College of Plant  
9 Science and Technology, Beijing University of Agriculture, Beijing, China 102206

10 <sup>2</sup>Bioinformatics Center, Beijing University of Agriculture, Beijing, China 102206

11 <sup>3</sup>Boyce Thompson Institute, Cornell University, Ithaca, NY 14853

12 <sup>4</sup>Department of Molecular Genetics, Ohio State University, Columbus, OH 43210

13 <sup>5</sup>Department of Biological Sciences, Mississippi State University, Starkville, MS 39759

14 <sup>6</sup>Center for Applied Genetic Technologies, University of Georgia, Athens, GA, 30602

15 <sup>7</sup>Institute for Plant Breeding, Genetics and Genomics, University of Georgia, Athens, GA, 30602

16 <sup>8</sup>Department of Horticulture, University of Georgia, Athens, GA, 30602

17 <sup>9</sup>USDA-ARS, Robert W. Holley Center for Agriculture and Health, Ithaca, NY, 14853

18 <sup>10</sup>Present address: Department of Plant Pathology, Ohio State University, Wooster, OH 44691

19 <sup>11</sup>Present address: Department of Biological Sciences, Louisiana State University, Baton Rouge,  
20 LA 70803

21 \*Correspondence: yz@moilab.net, wang@biology.msstate.edu, zf25@cornell.edu

22 **Abstract**

23 Tomato has undergone extensive selections during domestication. Recent progress has shown that  
24 genomic structural variants (SVs) have contributed to gene expression dynamics during tomato  
25 domestication, resulting in changes of important traits. Here, through comprehensive analyses of  
26 small RNAs (sRNAs) from nine representative tomato accessions, we demonstrate that SVs  
27 substantially contribute to the dynamic expression of the three major classes of plant sRNAs:  
28 microRNAs (miRNAs), phased secondary short interfering RNAs (phasiRNAs), and 24-nt  
29 heterochromatic siRNAs (hc-siRNAs). Changes in the abundance of phasiRNAs and 24-nt hc-  
30 siRNAs likely contribute to the alteration of mRNA gene expression during tomato's recent  
31 evolution, particularly for genes associated with biotic and abiotic stress tolerance. We also  
32 observe that miRNA expression dynamics are associated with imprecise processing, alternative  
33 miRNA-miRNA\* selections, and SVs. SVs mainly affect the expression of less-conserved  
34 miRNAs that do not have established regulatory functions or low abundant members in highly  
35 expressed miRNA families, highlighting different selection pressures on miRNAs compared to  
36 phasiRNAs and 24-nt hc-siRNAs. Our findings provide insights into plant sRNA evolution as well  
37 as SV-based gene regulation during crop domestication. Furthermore, our dataset provides a rich  
38 resource for mining the sRNA regulatory network in tomato.

## 39 Introduction

40 Tomato is the world leading fruit crop in terms of total production and market value  
41 (<http://www.fao.org/faostat>). Originally domesticated in Northern Ecuador and Peru, tomato  
42 underwent further selections in Central America and Mexico prior to its arrival in Europe in the  
43 early 16<sup>th</sup> century [1-3]. Along the way, selections had been made for larger fruit, enhanced flavor,  
44 and improved resistance to biotic and abiotic stresses [4]. These phenotypic changes reflect the  
45 alterations in gene sequences and expression.

46 Recent evidence has demonstrated that genomic structural variants (SVs) are strongly  
47 associated with selection pressure over the course of tomato's recent evolution that impact the  
48 expression of genes underlying certain agronomic traits [5, 6]. SVs include insertions, deletions,  
49 duplications, inversions and translocations, and many of them serve as the causative genetic  
50 variants for diverse crop traits that have been selected during domestication [5, 6]. For example,  
51 the decrease of fruit lycopene levels is strongly associated with deletions in the promoters of  
52 multiple key genes involved in lycopene biogenesis in modern tomato [5]. However, the molecular  
53 basis underlying the link between genome-wide SVs and gene expression often remains elusive.

54 Small RNA (sRNA)-mediated gene silencing acts as a key mechanism in regulating gene  
55 expression in most eukaryotic organisms. In plants, there are three major groups of sRNAs:  
56 microRNAs (miRNAs), phased secondary short interfering RNAs (phasiRNAs), and 24-nt  
57 heterochromatic siRNAs (hc-siRNAs) [7, 8]. MiRNAs, phasiRNAs and hc-siRNAs are generated  
58 by Dicer-like enzymes (DCLs): DCL1, DCL4, and DCL3, respectively [9]. After production, they  
59 are loaded into the RNA-induced silencing complex (RISC) for function [10]. In plants, miRNAs  
60 and phasiRNAs with a length of 21 or 22 nt mainly guide cleavage of target mRNAs. By contrast,  
61 24-nt hc-siRNAs play a major role in RNA-directed DNA methylation to confer epigenetic  
62 regulation over gene expression [7]. It is known that sRNA-based regulation relies on the  
63 abundance of the sRNAs [11]; therefore sRNA abundance has a significant impact on the functions.

64 In plants, miRNAs and phasiRNAs among distinct species are evolutionarily fluid [12, 13].  
65 Comparative studies on miRNA gene evolution in *Arabidopsis lyrata* and *A. thaliana* that diverged  
66 more than 10 million years ago have discovered numerous less conserved miRNA genes that  
67 exhibit high divergence in hairpin structures, processing fidelity, and target complementarity [14,  
68 15]. With the increasing number of analyses on sRNA sequencing (sRNA-Seq) data, more and  
69 more less conserved miRNAs and phasiRNA-generating loci (PHASs) have been uncovered in

70 diverse species from green algae to flowering plants [12, 13, 16, 17]. However, whether and how  
71 the expression patterns and functions of sRNAs have been changed in shorter evolutionary times  
72 such as during crop domestication is unknown. Tomato evolved from a wild red-fruited progenitor  
73 species, *Solanum pimpinellifolium* (SP) approximately 80 thousand years ago into *S. lycopersicum*  
74 var. *cerasiforme* (SLC) [3, 18]. Semi-domesticated SLC further evolved into the fully  
75 domesticated tomato, *S. lycopersicum* var. *lycopersicum* (SLL). The evolution within the red-  
76 fruited tomato clade provides a unique system for studying selection and functional divergence of  
77 plant sRNAs in a shorter time scale thanks to its extensive genetic and genomic resources. Analysis  
78 of samples from wild and domesticated tomato accessions may reveal novel regulatory details  
79 underlying sRNA evolution and function.

80 Here, we present comprehensive sRNA profiles of cultivated tomatoes and their wild  
81 progenitors, and the novel discovery that genomic SVs can substantially influence sRNA  
82 expression dynamics. Our findings show that SVs are an important driving force for the dynamic  
83 expression of sRNAs. Moreover, we show that SVs can change the hc-siRNA hotspots in  
84 promoters of nearly 100 protein-coding genes, thereby altering their expression. These genes are  
85 mostly associated with responses to biotic and abiotic stresses. SVs are also correlated with many  
86 rapid birth and death of PHASs that are overwhelmingly related to disease resistance traits. SVs  
87 overlapping with miRNA genes can determine the gain or loss of certain less-conserved miRNA  
88 genes or affect the expression of miRNAs. Interestingly, the differential expression of miRNAs  
89 has a neglectable effect on transcriptomes, in contrast to the changes in mRNA expression  
90 regulated by the dynamics of hc-siRNA hotspots. Our findings unravel SV-related differential  
91 expression of 24-nt hc-siRNAs regulating the expression of certain genes associated with  
92 responses to biotic and abiotic stresses as well as differential selection pressures over distinct  
93 classes of sRNAs during tomato domestication. Our dataset is also valuable to promote other  
94 sRNA-related functional studies on tomato development and domestication.

95

## 96 **Results**

### 97 **Comprehensive tomato sRNA profiles highlighting expression dynamics as a consequence of** 98 **domestication**

99 Resulting from domestication, tomatoes underwent substantial changes in plant morphology, yield,  
100 fruit flavor and adaptation to adverse environments, reflecting certain levels of adjustments in both

101 genomes and transcriptomes. We selected nine accessions spanning from wild ancestors (*Solanum*  
102 *pimpinellifolium*), semi-domesticated populations (*S. lycopersicum* var. *cerasiforme*) to  
103 domesticated tomatoes (*S. lycopersicum* var. *lycopersicum*) for comprehensive transcriptome  
104 analyses. These accessions included two SP accessions (BGV006370 collected in Peru and  
105 BGV007151 collected in Ecuador), six SLC accessions (BGV005895, BGV007023 and PI 129026  
106 collected in Ecuador; BGV007990 and BGV008189 collected in Peru; BGV008219 collected in  
107 Costa Rica), and one SLL accession (BGV007863 collected in Mexico) [1, 3].

108 For each accession, transcriptome profiles including both sRNA and mRNA profiles were  
109 investigated in young leaves, anthesis-stage flowers, and fruits at four different developmental  
110 stages (young green, mature green, breaker and red ripe). The four fruit developmental stages have  
111 previously been used to analyze the gene regulatory networks in a single accession of domesticated  
112 tomato [19, 20]. Therefore, our comprehensive dataset would empower detailed dissection on the  
113 gene regulatory networks underlying the fruit ripening process in addition to the transcriptome  
114 profiles of leaf and flower.

115 To ensure sampling at comparable developmental stages of different tomato accessions,  
116 we first documented the timing of fruit developments by tracking 10-20 fruits from 3-5 plants of  
117 each accession. As shown in **Fig. S1**, the two SP accessions exhibited slightly early ripening  
118 whereas SLL ripened one week later. Ripening time in SLC accession varied from as early as SP  
119 to as late as SLL. We collected samples at the chosen time points and constructed a total of 162  
120 sRNA-Seq libraries (**Table S1**). The three replicates from young green fruits of BGV007023 did  
121 not pass quality check, so we only used the remaining 159 libraries for the subsequent analyses.  
122 Principal component analysis (PCA) showed that samples at the same developmental stage were  
123 clustered together (**Fig. S2A**). In addition, expression profiles in SLC and SLL accessions were  
124 more closely related in comparison to profiles in SP accessions (**Fig. S2B**). Analysis on sRNA size  
125 distribution showed that 24-nt siRNAs were the most dominant (**Fig. S2C**). Interestingly, 24-nt  
126 siRNAs were slightly more abundant in leaf and young green fruit samples (**Fig. S2C**). To improve  
127 the sRNA mapping accuracy, we exploited two high-quality reference genomes (genomes of the  
128 domesticated Heinz 1706 and an SP accession LA2093) as detailed in a recent study [5]. It is  
129 noteworthy that as expected, reads from SP samples were mapped to the LA2093 genome with a  
130 slightly higher rate, while reads from SLC and SLL samples were mapped to the Heinz SL4.0

131 with a slightly higher rate (**Fig. S2D**). RNA-Seq libraries were also generated from the same  
132 samples and described in our previous study [5, 21].

133

### 134 **Hc-siRNA hotspots and structural variants**

135 The 24-nt hc-siRNAs play a major role in RNA-directed DNA methylation, a fundamental  
136 mechanism in epigenetic regulation [7, 8]. We reasoned that comparative analyses on hc-siRNA  
137 accumulation patterns may provide insights into the dynamic epigenetic changes underlying trait-  
138 related gene expression. When analyzing the global hc-siRNA abundance across the 12 tomato  
139 chromosomes, we noticed that hc-siRNA abundance displayed a strong genome-wide correlation  
140 with the density of SVs (**Fig. 1A**). This observation infers a novel model that epigenetic regulation  
141 may be influenced by SVs during crop domestication, which could lead to large scale gene  
142 expression changes.

143 To obtain more evidence in support of this model, we analyzed SV-overlapping hc-siRNA  
144 hotspots in promoter regions of protein-coding genes, and identified hc-siRNA and protein-coding  
145 gene pairs whose abundances showed simultaneous negative correlations in our sRNA-Seq and  
146 RNA-Seq data. For each tissue or development stage, we performed pairwise comparisons  
147 between SP and SLL accessions (2 comparisons), between SP and SLC accessions (12  
148 comparisons except 10 for young green fruit stage), and SLC and SLL accessions (6 comparisons  
149 except 5 for young green fruit stage), therefore a total of 117 pairwise comparisons for all six  
150 tissues/developmental stages. A total of 1,386 protein-coding genes affected by the SV-  
151 overlapping hc-siRNA hotspots were identified in at least one comparison. We noticed that most  
152 of these genes under the control of this novel epigenetic regulation were expressed in leaf and  
153 flower (**Fig 1B**). Gene ontology (GO) term analysis showed that the majority of the protein-coding  
154 genes affected by these domestication-associated epigenetic changes were related to pathways in  
155 response to biotic and abiotic stresses as well as development and several developmentally related  
156 processes (**Fig. 1C**), implying a selection pressure favoring expression changes in genes related to  
157 environmental adaptation including selection for domestication traits. To obtain highly confident  
158 negative correlations between differentially accumulated 24-nt hc-siRNAs and the cognate  
159 protein-coding genes, we focused on the pairs of hc-siRNAs and the negatively correlated protein-  
160 coding genes repeated in at least ten pairwise comparisons, which resulted in the identification of  
161 99 protein-coding genes (**Table S2**). The majority of these 99 genes are involved in plant resistance

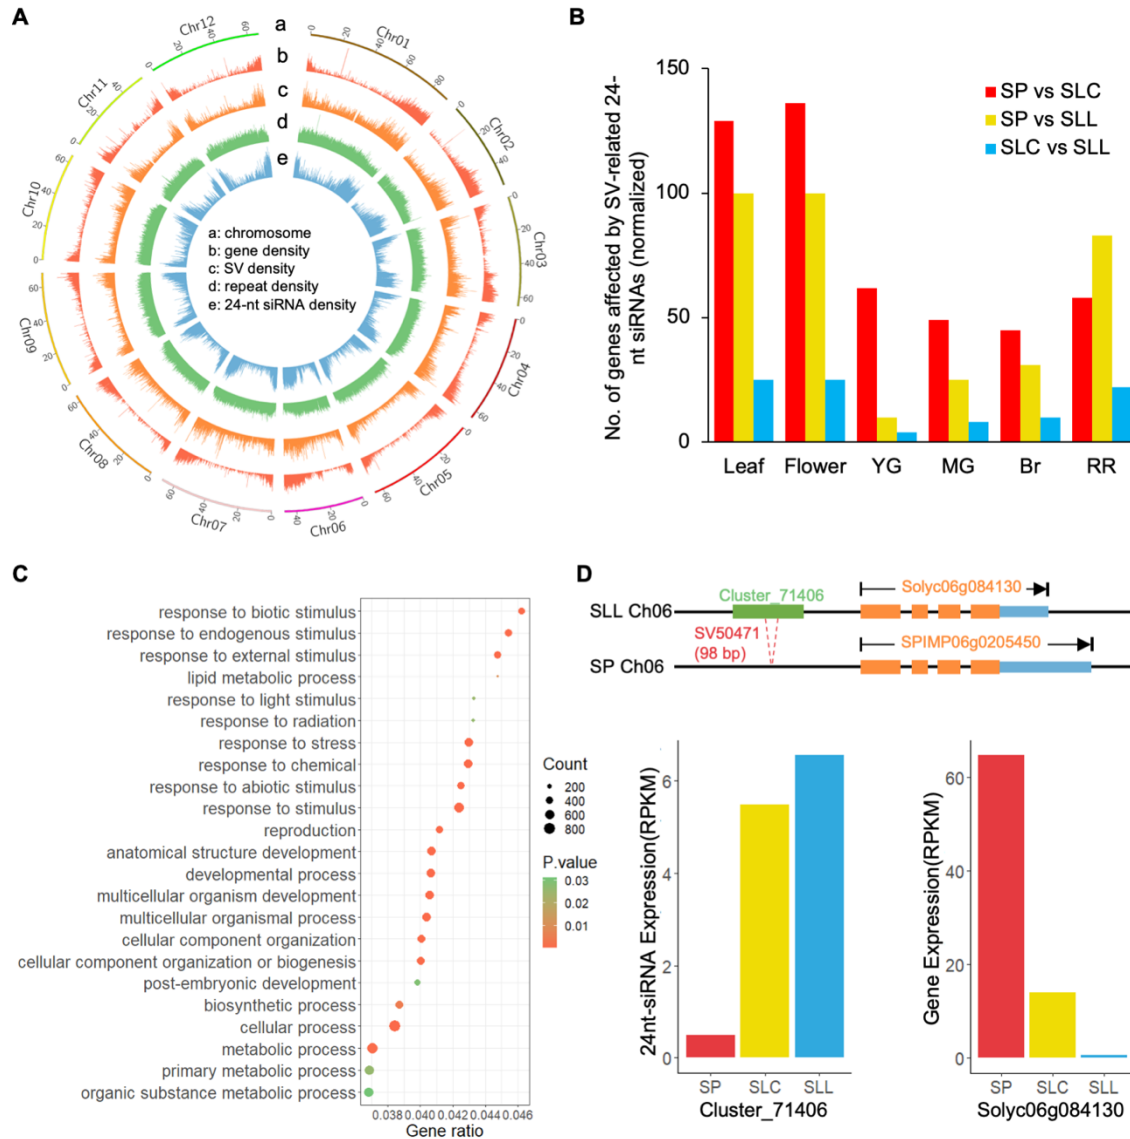

162

163 **Figure 1.** Functional analysis of SV-related 24-nt hc-siRNA regions among wild and cultivated tomatoes.  
 164 **A.** Circos plot of the densities of 24-nt hc-siRNAs, genes, repeat sequences, and SVs across the tomato  
 165 genome. **B.** Differentially expressed genes showing a negative correlation with the corresponding SV-  
 166 related 24-nt hc-siRNA clusters in their promoters in at least one pairwise comparison. YG, young green  
 167 fruit; MG, mature green fruit; Br, fruit at the breaker stage; RR, red ripe fruit. **C.** GO term enrichment  
 168 analysis of differentially expressed genes in **(B)**. **D.** SV-related 24-nt hc-siRNA (Cluster\_71406)  
 169 enrichment leading to the repression of *Solyc06g084130* expression in SLL (*Solanum lycopersicum* var.  
 170 *lycopersicum*) and SLC (*S. lycopersicum* var. *cerasiforme*) compared to SP (*S. pimpinellifolium*).  
 171

172 to pathogens. Therefore, SVs appeared to have played a role in shaping the hc-siRNA hotspots  
 173 across the tomato genome. This regulation over the dynamics of hc-siRNA hotspots has resulted  
 174 in differential gene expression during tomato domestication, probably under the selection pressure  
 175 for plant adaptation to different environments and in agricultural settings.



176 A notable example is a BAX inhibitor-1 (BI-1) family gene (*Solyc06g084130*). BI-1  
177 proteins are conserved in eukaryotic organisms and associated with cell death during host-  
178 pathogen interactions [22-24]. In plants, BI-1 proteins regulate the autophagy process [23] and  
179 confer plant resistance to various pathogens [23, 25-27]. In particular, BI-1 expression regulates  
180 autophagic activity that is critical for *N* gene-mediated resistance to tobacco mosaic virus [23], a  
181 major viral pathogen of tomato. The repression of *Solyc06g084130* expression was strongly  
182 associated with SV-related 24-nt hc-siRNA differential accumulation from SP to SLC and SLL  
183 plants (**Fig. 1D**). Similar repression patterns could be found in multiple genes related to responses  
184 to biotic stresses (**Table S2**). Therefore, the repression of *Solyc06g084130* and other genes in  
185 response to biotic stresses during tomato domestication may affect tomato resistance traits, which  
186 is consistent with the observation that cultivated tomatoes are not well adapted to adverse  
187 environments as wild tomatoes.

188

### 189 **Highly dynamic gain/loss of phasiRNA generating loci during domestication**

190 PhasiRNAs are known regulators of gene expression in plants [28] and exhibit expression  
191 dynamics in response to environmental cues [13]. Current models suggest that phasiRNAs serve  
192 as negative regulators to modulate the expression of their parental transcripts [13, 28]. Although  
193 there is rapid progress in uncovering an enormous amount of phasiRNA-generating loci in various  
194 plants [13, 28] and unraveling their functions in plant development [29-31], a detailed analysis of  
195 phasiRNA dynamics during crop domestication has not been conducted. Using a previously  
196 established algorithm [32], we analyzed phasiRNA-generating loci across all nine accessions and  
197 identified 290 PHASs mapped to the Heinz 1706 genome (SL4.0) and 286 mapped to the LA2093  
198 genome, among which 77 were uniquely mapped to SL4.0 and 73 uniquely mapped to the LA2093  
199 genome (**Tables S3-5**). In general, PHASs were mainly mapped to protein-coding genes with  
200 diverse functions as shown in the GO term analysis (**Fig. S3A**), akin to our previous findings [13].

201 Interestingly, we found 34 SV-overlapping PHASs mapped to SL4.0 and 39 mapped to the  
202 LA2093 genome, among which 12 were uniquely mapped to SL4.0 and 17 uniquely mapped to  
203 the LA2093 genome (**Table S6**). SV-related PHASs were distributed across all chromosomes  
204 except chromosome 4 and 7, and there were numerous SV-related PHASs residing proximal to  
205 the terminal region of the long arm of chromosome 11 (**Fig. 2A**). SVs markedly contributed to the  
206 changes in PHASs among accessions in different tomato groups (**Fig. S3B**), and these PHASs



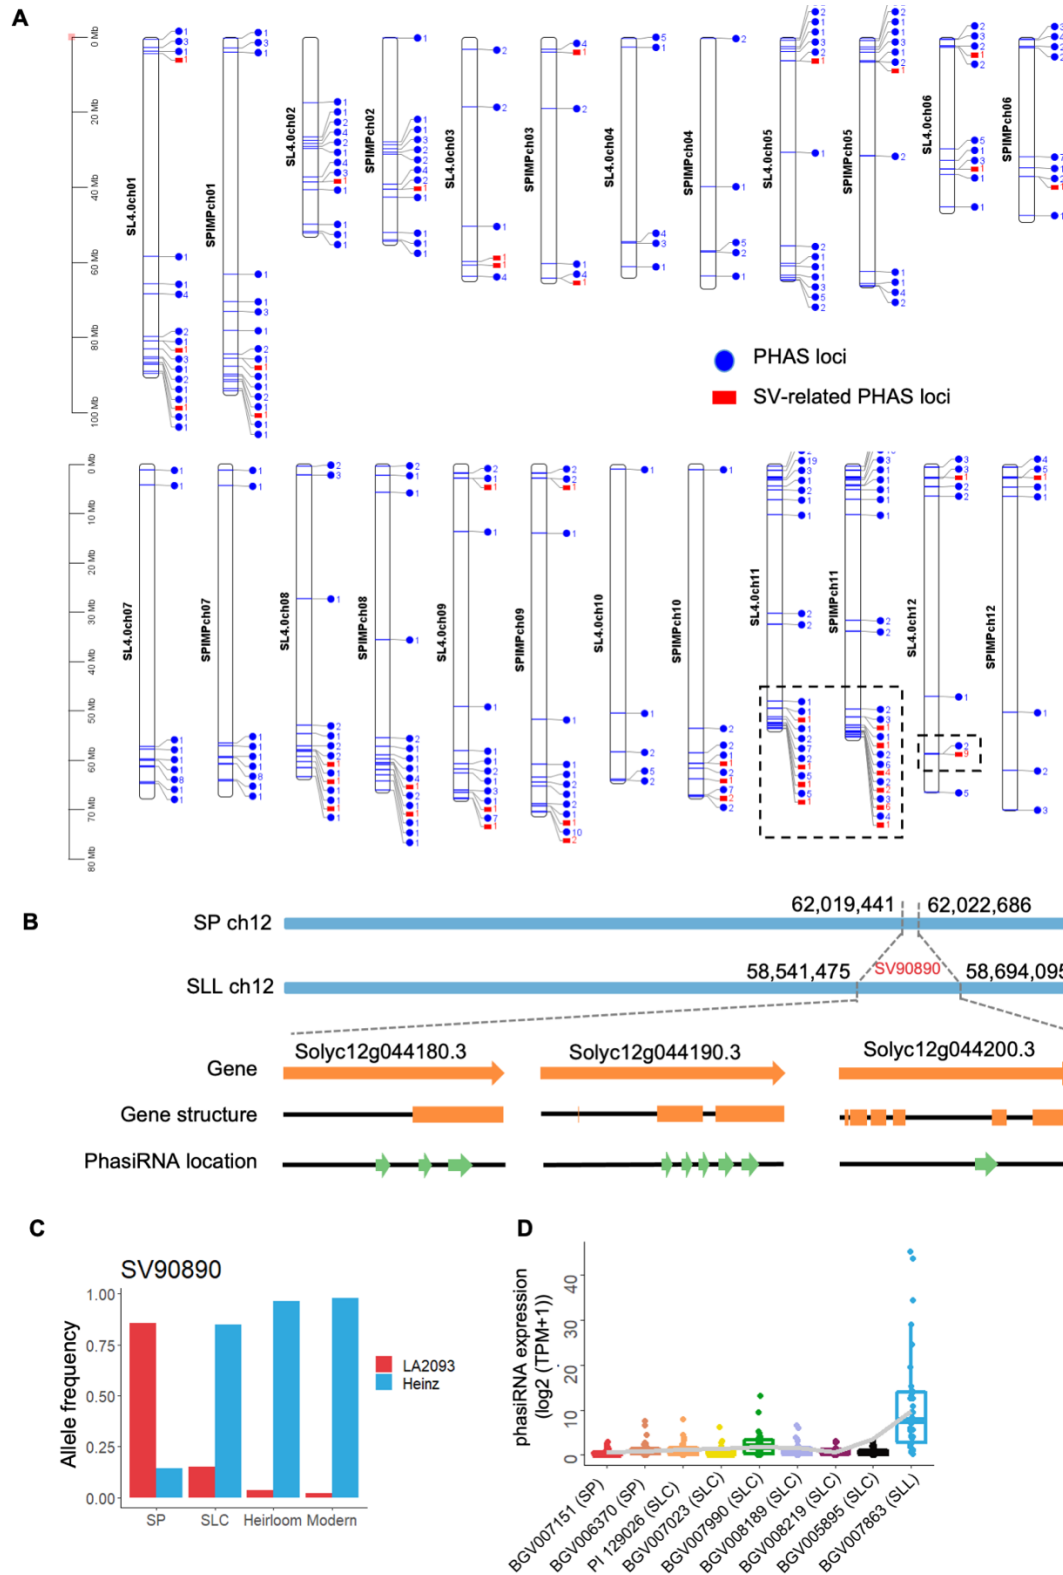

207

208 **Figure 2. SV-related PHASs. A.** Distribution of PHAS loci and SV-related PHAD loci across the 12 tomato

209 chromosomes. The number depicts the distinct PHASs at each locus. **B.** SV90890 causes gain/loss of

210 PHASs and protein-coding genes. **C.** Allele frequency of SV90890 in different tomato groups. **D.**

211 Abundance of phasiRNAs in the genome region of SLL Heinz 1706 containing SV90890 in the nine tomato  
212 accessions. For each box plot, the lower and upper bounds of the box indicate the first and third quartiles,  
213 respectively, and the center line indicates the median. The whisker represents 1.5× interquartile range of  
214 the lower or upper quartile.  
215

216 were overwhelmingly mapped to disease resistance genes (**Fig. S3C**). This observation hints the  
217 possibility that selection pressure favors the emergence of phasiRNAs regulating the expression  
218 of disease resistance genes in balancing growth and pathogen defense.

219 One cluster of disease resistance genes resided in a region where an insertion in the Heinz  
220 1706 genome expanded the PHASs on chromosome 12 (**Fig. 2B**). All three genes in this inserted  
221 region are involved in tomato resistance to bacterial and oomycete pathogens [33]. As shown in  
222 **Fig. 2C**, the frequency of the insertion associated with this gene cluster drastically increased in  
223 domesticated tomato to nearly 100%. Productions of phasiRNAs associated with this SV were also  
224 highly elevated in the SLL accession (**Fig. 2D**).  
225

## 226 **A large portion of miRNAs exhibit highly dynamic expression patterns**

227 The functions of many miRNAs in tomato growth and fruit development have been well studied  
228 in single accession analyses [20, 34, 35]. However, detailed analyses on miRNA expression  
229 profiles are lacking to infer the dynamics of miRNA-based gene regulatory network during crop  
230 domestication. To this end, we annotated all the miRNAs in our sRNA-Seq dataset based on  
231 recently revised criteria [36]. We identified 122 miRNA genes mapped to SL4.0 and 126 mapped  
232 to the LA2093 genome. Both sets included 72 previously reported tomato miRNAs [20, 37, 38].  
233 There were 116 miRNA genes mapped to both SL4.0 and the LA2093 genome, while there were  
234 six and ten miRNA genes specifically mapped to SL4.0 and the LA2093 genome, respectively  
235 (**Table S7**). Based on the mapping results, we summarized the mature miRNAs and miRNA\*s as  
236 well as the processing variants from the miRNA precursors in **Table S8-9**.

237 A close look at the mature miRNAs showed that the majority of known miRNAs were 21-  
238 nt in length with “U” as the first nucleotide (**Fig. S4**), in line with previous observations [12].  
239 Notably, the majority of novel miRNAs were 20-nt in length with “A” as the first nucleotide (**Fig.**  
240 **S4**), which implied that those miRNAs could lack regulatory functions. To our surprise, we found  
241 that a large portion of miRNAs exhibited highly variable expression patterns among accessions.  
242 For example, as shown in **Table S10**, the two SP accessions each has ~120 miRNAs that displayed

243 1.5-fold changes in expression with an adjusted P value below 0.05 compared with SLC and SLL  
244 accessions.

245 To better describe this dynamic, we plotted miRNA expression profiles across the nine  
246 tomato accessions and categorized the patterns into multiple groups. As shown in **Fig. 3**, there  
247 were eight groups with each having more than ten distinct miRNAs. While the majority of the  
248 miRNAs exhibited dynamic expression profiles in SLC accessions, we found that those in groups  
249 1 and 7 exhibited an overall decrease while those in groups 5, 6, and 8 exhibited an overall increase  
250 in expression over the course of tomato's recent evolution. The presence of eight distinct groups  
251 also reflected the fluctuating expression patterns of miRNAs among different tomato accessions.  
252 However, we did not observe the corresponding changes in the expression of their targets, which  
253 will be further analyzed below.

254

### 255 **miRNAs and structure variants**

256 Despite the notion that most miRNA gene families had the same number of members mapped to  
257 SL4.0 and the LA2093 genome, some underwent deletion or duplication events that changed the  
258 number of members in each family. For example, there were two miR10535 genes in the LA2093  
259 reference genome but only one copy in Heinz 1706 SL4.0 (**Fig. 4A**). Synteny analysis showed that  
260 the loss of one miR10535 gene copy could be attributed to a deletion that had occurred during  
261 tomato domestication (**Fig. 4A**).

262 Since a genome deletion caused the loss of one copy of miR10535 gene, we reasoned that  
263 SVs might play important roles in determining the presence and the expression levels of miRNA  
264 genes. To this end, we identified 25 miRNA genes associated with 32 SVs, including 19 conserved  
265 and six novel miRNAs. Twenty-one out of 32 SVs were mapped to promoters of miRNA genes,  
266 seven were mapped to miRNA gene bodies, and four were mapped to both promoters and gene  
267 bodies of miRNAs (**Table S11**). Notably, most of these miRNAs do not have empirically  
268 confirmed targets according to previous degradome studies in tomato [20, 39-41]. GO term  
269 analysis showed that the computationally predicted target genes of SV-overlapping miRNAs were  
270 mainly involved in the development/growth and responses to environmental stimuli (**Fig. 4B**).

271 SVs in promoter regions may affect miRNA expression. For example, a 17-bp deletion  
272 (SV49979) in the promoter of the miR172a/b-2 gene was observed in genomes of most heirloom  
273 and modern tomatoes (**Fig. 5A**). It is worth noting that the allele frequency of SV49949

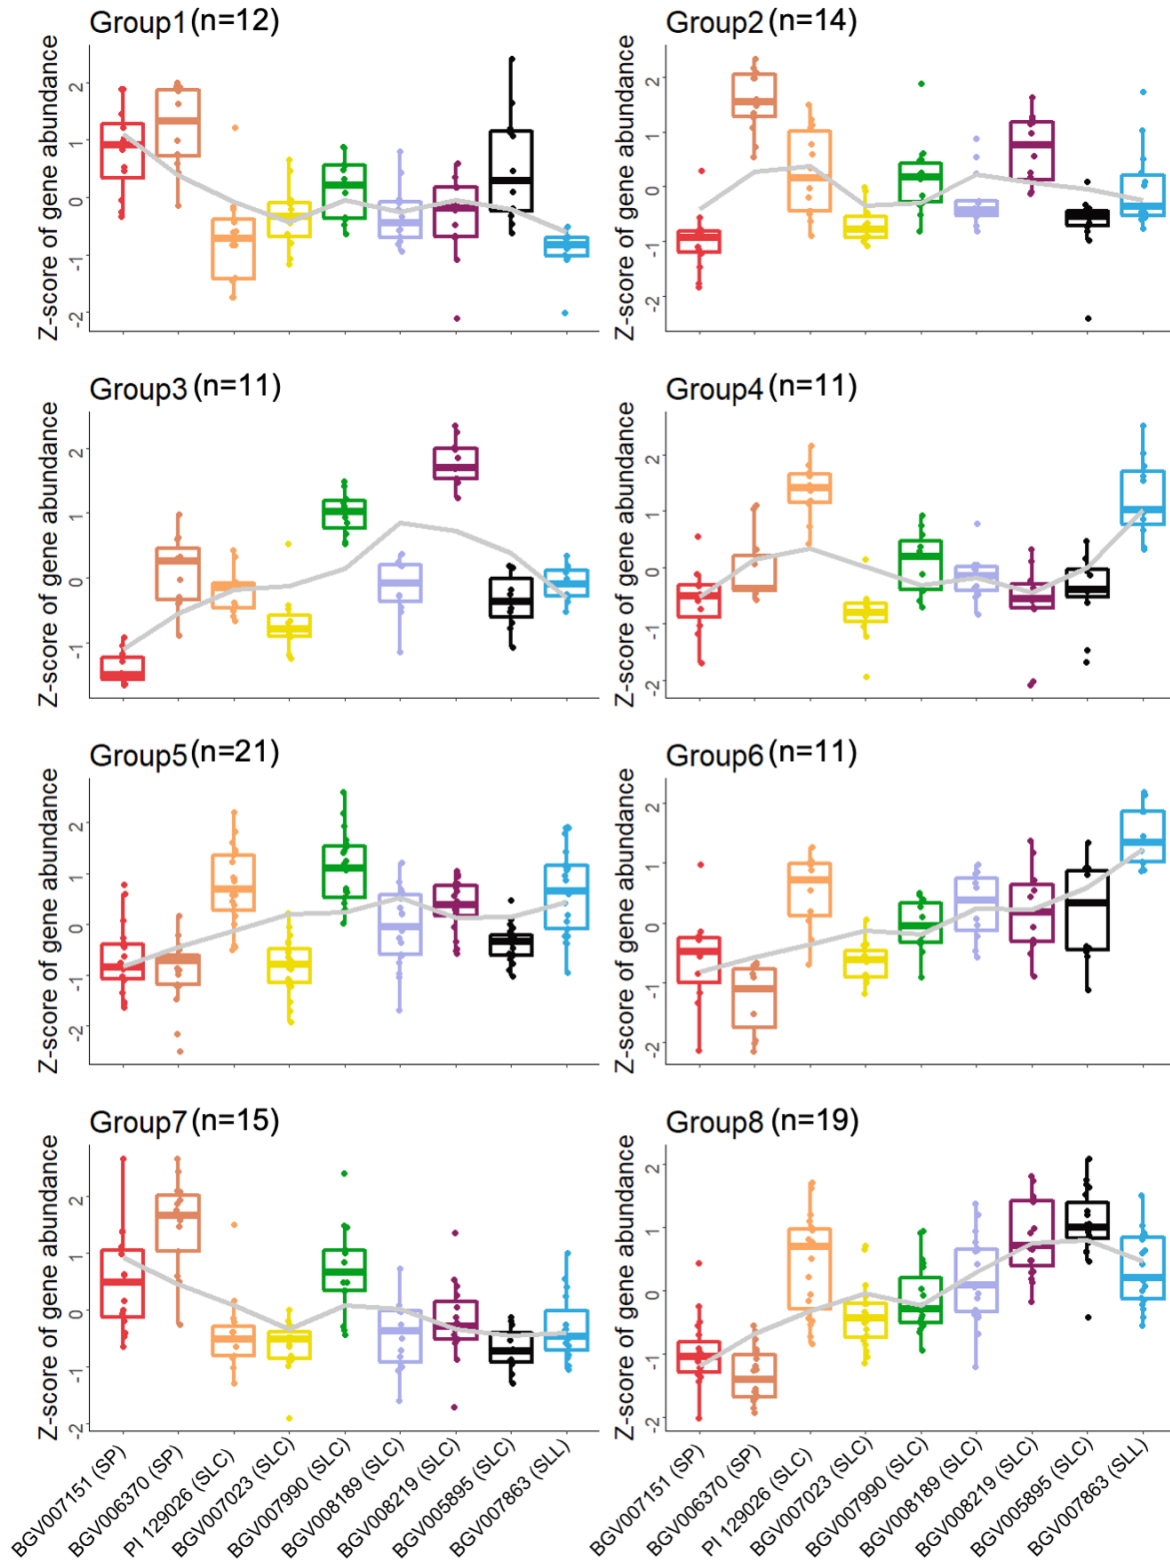

274

275

276

277

**Figure 3.** Distinct expression patterns of miRNAs. For each box plot, the lower and upper bounds of the box indicate the first and third quartiles, respectively, and the center line indicates the median. The whisker represents  $1.5\times$  interquartile range of the lower or upper quartile.

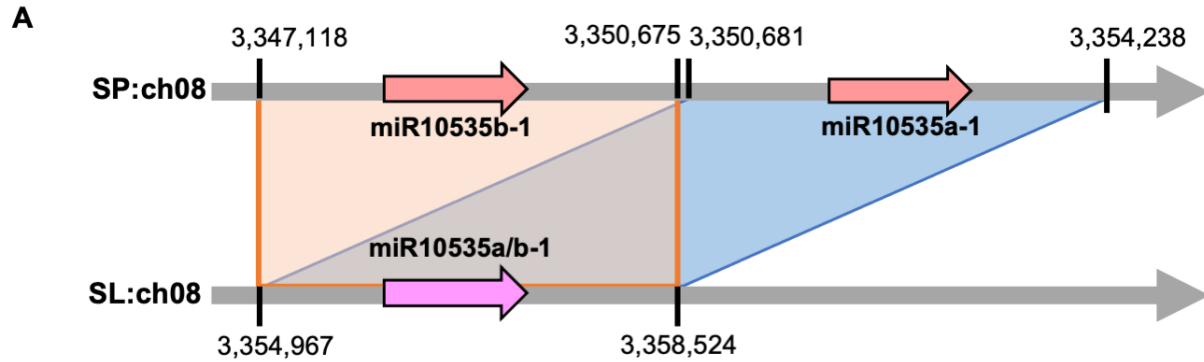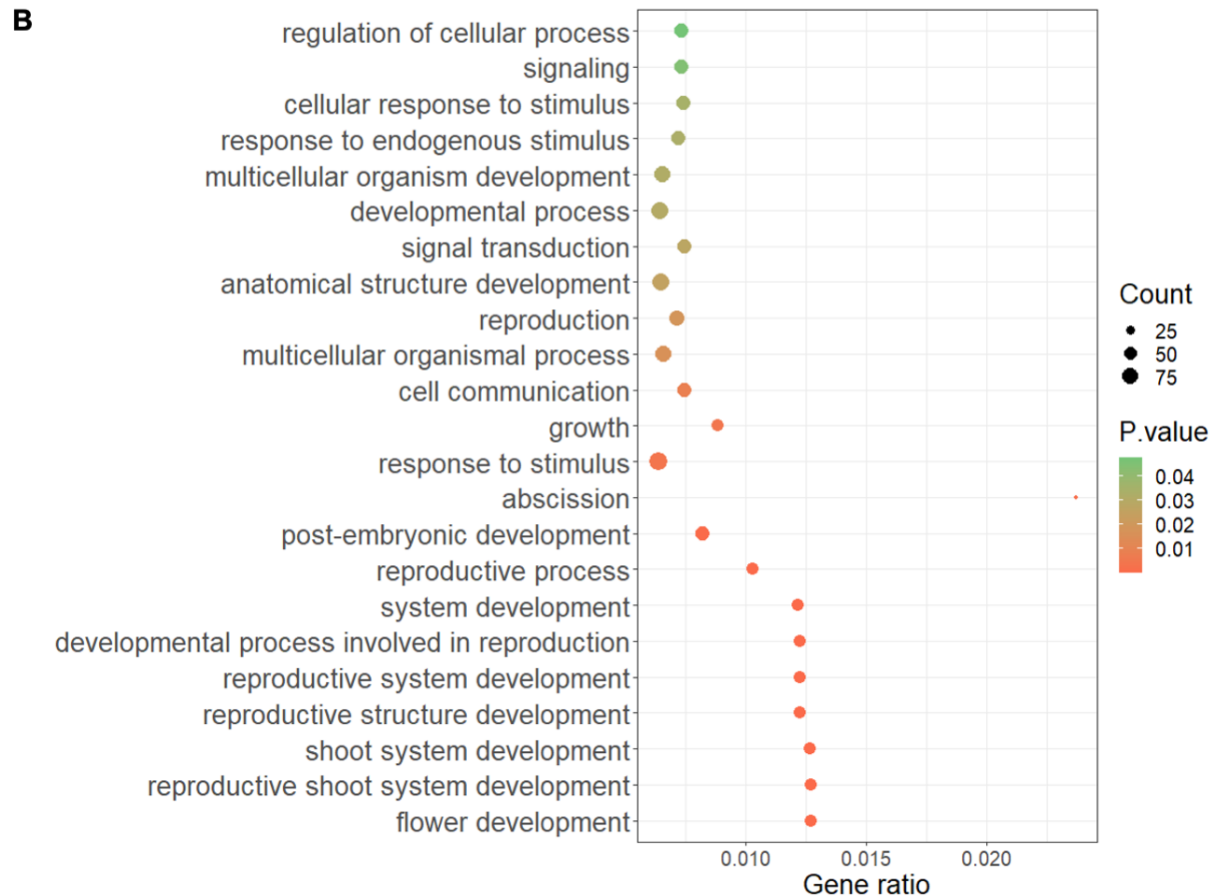

278  
279 **Figure 4.** MiRNA genes overlapped with SVs. **A.** Synteny diagram of miR10535 gene(s) in SP and SLL  
280 reference genomes. **B.** Enriched GO terms of predicted target genes of SV-related miRNAs.

281  
282 significantly changed during domestication (**Fig. 5B**). Correspondingly, miR172a/b-2 had distinct  
283 expression profiles during fruit development among the nine tomato accessions and showed an  
284 overall increased expression pattern in the SLC and SLL accessions (**Fig. 5C**). Due to the low

285 abundance of miR172a/b-2 compared to the total miR172 abundance (**Tables S8 and S9**), this  
 286 expression change in miR172a/b-2 did not significantly affect the expression of any miR172  
 287 targets.

288

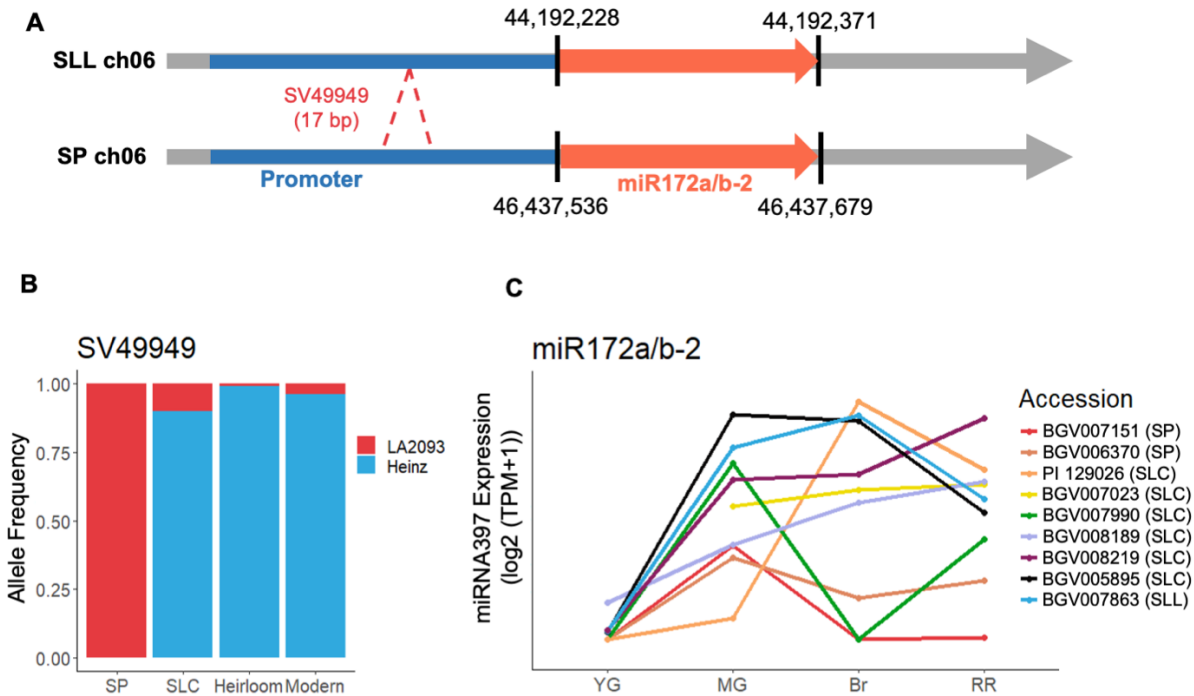

289

290 **Figure 5. SV affects miRNA expression. A.** Diagram showing SV49949 (a 17-bp indel) in the  
 291 promoter of miR172a/b-2 gene. **B.** Allele frequency of SV49949 in different tomato groups. **C.**  
 292 Expression profiles of miR172a/b-2 in different tomato accessions. YG, young green fruits. MG,  
 293 mature green fruits. Br, fruits at the breaker stage. RR, red ripe fruits.

294

### 295 Imprecisely processed miRNAs are differently selected

296 It is known that some miRNA precursors tend to generate a population of miRNA-miRNA\* pairs  
 297 due to the imprecise processing by DCL1 [42]. The imprecise processing may affect miRNA  
 298 function that heavily relies on sequence complementarity between miRNAs and their targets [43].  
 299 We found eight out of 122 SLL miRNA genes and six out of 126 SP miRNA genes that generated  
 300 more than six variants in our dataset, among which six were shared in both SLL and SP reference  
 301 genomes (**Table S12**). The miR397 gene, a conserved miRNA across different plant lineages, had  
 302 six miR397-3P and seven miR397-5P variants in tomato (**Fig. 6A**). Notably, we observed a shift  
 303 in the most abundant product of the miR397 precursor: from only miR397-3P that was expressed  
 304 in SP accessions transitioning to miR397-5P (the conserved mature miR397 in plants) that became



305 more prevalent in most SLC and SLL accessions (**Fig. 6B**). Over-expression of miR397-5P can  
 306 enhance tomato response to drought [44], suggesting the beneficial function of miR397-5P in SLC  
 307 and SLL accessions in adaptation to adverse environments. Nevertheless, the target of miR397-5P  
 308 remains unclear in spite of extensive efforts of degradome analysis [20, 39-41].  
 309

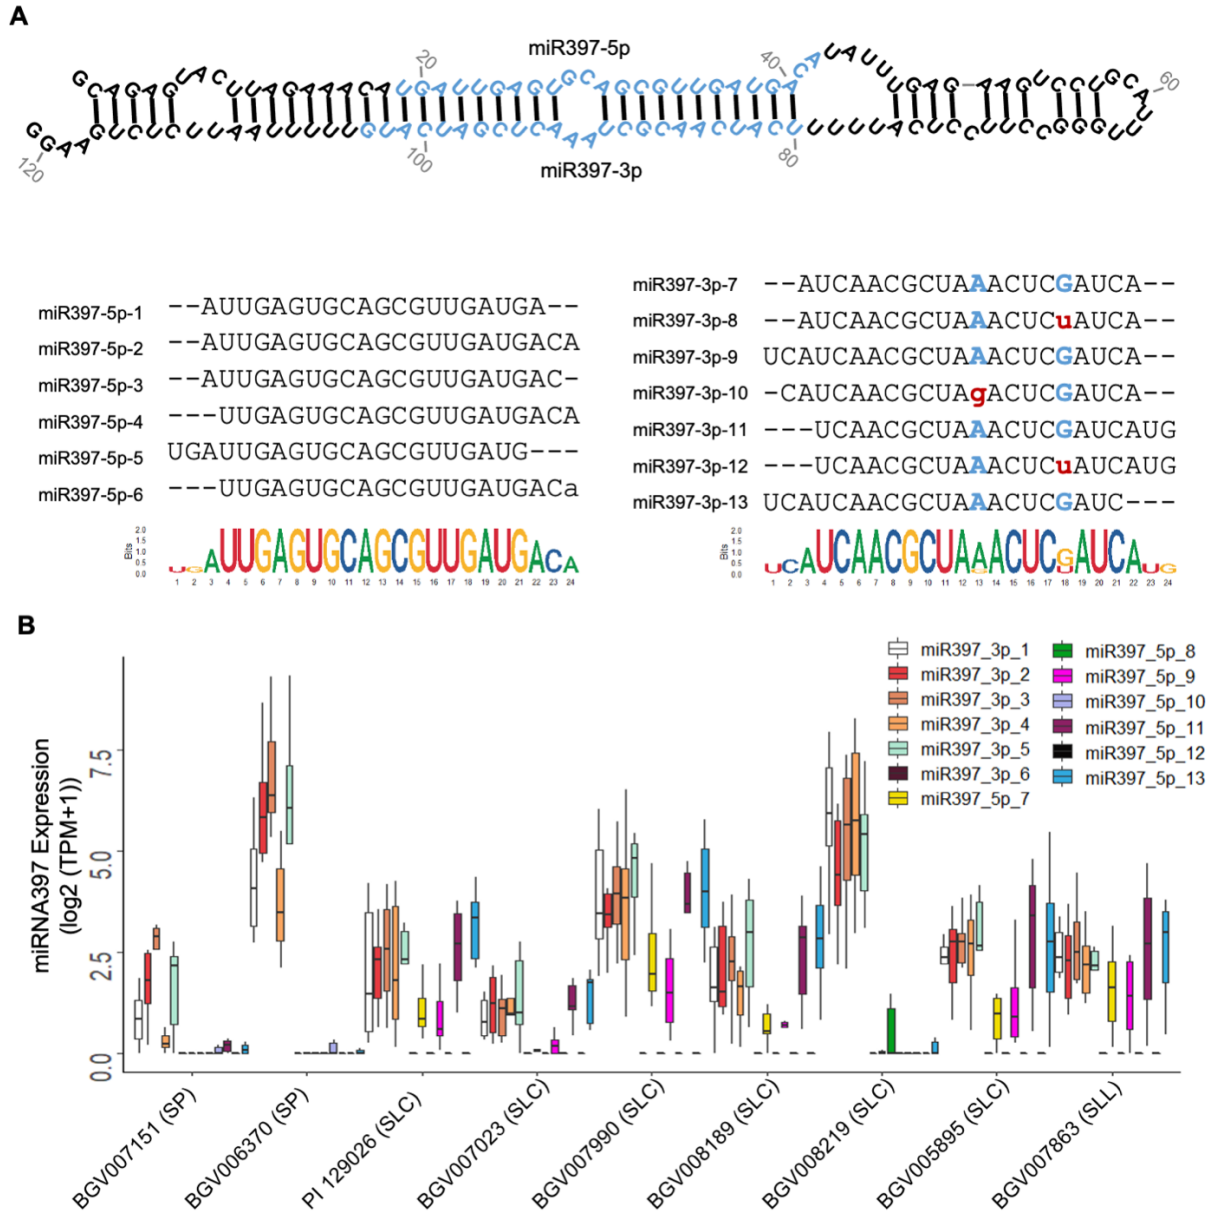

310 **Figure 6.** Changes in miR397 expression during tomato domestication. **A.** Diagram showing the six 5P and  
 311 seven 3P processing variants from the miR397 precursor. **B.** Abundance of each miR397 variant in different  
 312 tomato accessions.  
 313  
 314



315 We also observed a position shift of miRNA:miRNA\* in the precursor of miR9472. The  
316 miRNA:miRNA\* duplex was closer to the terminal loop region in SP and SLC accessions but  
317 resided at a more distant region away from the terminal loop in SLL (**Fig. S5**). This shift was  
318 unlikely caused by any changes in recognition by DCL1 as the precursor sequences remained the  
319 same. Notably, we found seven such examples as listed in **Table S13**. This observation indicates  
320 that DCL1 recognition on miRNA precursors is likely flexible in plants, and the selection pressure  
321 plays a role in determining the expression of the final miRNA:miRNA\* duplexes.

322

### 323 **Discussion**

324 Small RNAs are critical regulators of gene expression underlying tomato growth and responses to  
325 environmental cues [20]. sRNA abundance is known to directly impact their functions. To gain a  
326 better understanding of sRNA dynamic expression during tomato domestication, we generated a  
327 comprehensive sRNA dataset using nine representative tomato accessions spanning from the wild  
328 SP progenitors, intermediate SLC accessions, and one domesticated accession, and covering  
329 samples from leaf, flower, and fruits at four critical developmental stages. Our high-quality dataset  
330 fulfills the immediate needs for high-resolution comparative analyses on sRNA expression and  
331 inferring their functions in wild, semi-domesticated, and domesticated tomato plants, as well as  
332 establishes a foundation for future exploration of sRNA functions.

333 Our dataset clearly demonstrates that all three classes of sRNAs (hc-siRNAs, phasiRNAs  
334 and miRNAs) have significant changes in expression during tomato's recent evolution. Notably,  
335 we found that SVs are an important driving force underlying the dynamic expression of these  
336 sRNAs. Those SVs, particularly deletions and insertions, probably have a direct impact on the  
337 production of all three major types of sRNAs. For example, deletions or insertions result in the  
338 differential accumulation of hc-siRNAs in gene promoter regions and the gain or loss of PHASs.  
339 SVs also contribute to the birth and death of miRNAs in domesticated tomatoes, as evidenced by  
340 the deletion of miR10535 and miR482f. When SVs reside in promoter regions of miRNA genes,  
341 they may influence miRNA expression, as evidenced in miR172a/b-2. In addition to SVs, we also  
342 notice that imprecise processing of miRNA/miRNA\* duplexes can lead to the dynamic expression  
343 of miRNAs during tomato domestication.

344 Tomato has a complex history of domestication, selection and breeding [1-3, 18]. Tomato  
345 domestication before cultivation possibly has a selection pressure on plant adaptation to new

346 environments and developmental processes. Domestication and re-domestication processes  
347 possibly have posed a selection pressure on tomato flavor and yield. The modern breeding  
348 processes possibly have posed a selection pressure on disease resistance. Interestingly, selection  
349 pressures appear to have distinct impacts on different classes of sRNAs. The SV-related dynamic  
350 expression of 24-nt hc-siRNAs and phasiRNAs predominantly impacts the expression of genes  
351 related to stress responses and growth, implying that the selection pressure favors the regulation  
352 of those trait-associated genes through hc-siRNA and phasiRNA pathways. In contrast, the  
353 conserved miRNAs play a major role in plant development mostly through regulating transcription  
354 factors [14, 15]. Some of those well-established regulations are conserved in most land plants [45-  
355 47]. Therefore, the selection pressure is unlikely to favor changes in such critical regulations  
356 related to plant growth in a relatively short timeframe during domestication. By contrast, many  
357 less conserved miRNAs, mostly expressed at low levels and/or having no to very few confirmed  
358 targets, exhibit highly dynamic expression during tomato domestication, reflecting little selection  
359 pressure on those miRNAs [14, 15].

360 Our dataset serves as a foundation for future studies on sRNA function associated with  
361 tomato growth, domestication, and beyond. Recent progress has demonstrated that miRNA gene  
362 families may exert functions through developmentally-regulated expression of specific members  
363 [48, 49]. Our dataset can help mining miRNA family members with developmentally-regulated  
364 expression patterns. For example, miR390b, with a U20A substitution at position 20 in comparison  
365 to miR390a, was specifically expressed in flowers (**Fig. S6**). The flower-specific expression of  
366 miR390b tripled the amount of total miR390 in flowers, which markedly promoted production of  
367 phasiRNAs from the *TAS3* locus as well as specifically suppressed the expression of *ARF3* and  
368 *ARF4* in flowers (**Fig. S6**).

369

## 370 **Methods**

### 371 ***Plant materials and RNA isolation***

372 Tomato plants were grown in a greenhouse at 25 °C and with a 16/8 hr light/dark cycle at Ohio  
373 State University (Columbus, OH). For each accession, young leaves, anthesis-stage flowers, and  
374 fruits at four different developmental stages (young green, mature green, breaker and red ripe)  
375 were collected with three biological replicates. Total RNAs from tomato samples were isolated  
376 and fractionated to >200 nt and <200 nt populations using the RNazol RT reagent (Sigma-Aldrich,

377 St. Louis, MO). sRNA species were further purified using the miRVana miRNA isolation kit  
378 (Thermo Fishier Scientific, Grand Island, NY) following the manufacturer's instructions. mRNA  
379 populations were further purified using the Magnetic mRNA isolation kit (NEB, Ipswich, MA).

380

### 381 ***Library construction and sequencing***

382 sRNA libraries were constructed following the established protocol [50]. Briefly, 18-30 nt sRNA  
383 populations purified on 15% (w/v) polyacrylamide/8M urea gel were ligated with 3'- and 5'-  
384 adapters. sRNA populations with adapters were reverse transcribed, PCR amplified, and then  
385 purified from the 8% native PAGE gel. Strand-specific RNA-Seq libraries were constructed using  
386 the protocol described before [51]. All the constructed libraries were analyzed and quantified by  
387 Bioanalyzer and sequenced on an Illumina HiSeq 2500 system.

388

### 389 ***sRNA sequence processing***

390 sRNA reads were processed to remove adaptors using the sRNA cleaning script provided in the  
391 VirusDetect package [52]. The trimmed sRNA reads shorter than 15 nt were discarded. The  
392 resulting sRNA reads were further cleaned by removing those that perfectly matched to the  
393 sequences of tRNAs, snoRNAs, snRNAs (collected from GenBank) or rRNAs [53] using Bowtie  
394 [54]. Raw counts for each unique sRNAs were derived and normalized into TPM (transcripts per  
395 million).

396

### 397 ***Identification of miRNAs and differential expression analysis***

398 MiRNAs were identified using ShortStack [55] from each of the 159 samples, and a series of  
399 filtering was applied to obtain high-confidence miRNAs. Briefly, the cleaned sRNA reads were  
400 mapped to wild (LA2093) and cultivated tomato (Heinz 1706, SL4.0 and ITAG 4.1) genomes  
401 separately, using ShortStack [55] with the parameter 'mmap' set to 'u'. Mature miRNAs and  
402 corresponding pre-miRNAs were then identified by ShortStack [55]. The identified miRNAs from  
403 these samples were collapsed if they were mapped to the exact locations in the genome. The  
404 collapsed miRNAs that existed in at least three samples and expressed at more than 10 TPM were  
405 considered as high-confidence miRNAs, which were compared with miRBase [56] to identify  
406 conserved miRNAs, whereas miRNAs that showed no matches in the miRBase were considered  
407 as novel miRNAs.

408 Raw counts of the identified miRNAs were processed using DESeq2 [57] to identify  
409 differentially expressed miRNAs among accessions. MiRNAs with adjusted p values < 0.05 were  
410 considered as differentially expressed. Differentially expressed miRNAs were further clustered  
411 into groups according to their expression patterns using the DEGreport program [58]. Target genes  
412 of differentially expressed miRNAs were predicted using the TargetFinder program [59]. GO  
413 enrichment analysis was performed on the target genes using GO::TermFinder [60].

414

#### 415 ***Identification of candidate PHAS loci***

416 We used the previously described methods to identify PHAS loci [13]. In brief, the cleaned sRNA  
417 reads were mapped to the wild (LA2093) and cultivated tomato (Heinz 1706, SL4.0 and ITAG  
418 4.1) reference genomes using Bowtie [54] allowing no mismatch and no more than six hits. The  
419 reference sequences were then scanned with a sliding window of 189 bp (nine 21-nt phase  
420 registers). A positive window was considered to contain no less than 10 unique sRNAs, with more  
421 than half of unique sRNAs being 21 nt in length and with no less than three 21-nt unique sRNAs  
422 falling into the phase registers. Windows were combined if 1) they shared the same phase registers  
423 and 2) fell into the same gene loci. P values and phasing scores for positive windows were  
424 calculated following the methods described previously [32, 61]. The sequences of PHASs and the  
425 flanking regions of 200 bp were retrieved and compared between wild and cultivated tomato  
426 reference genomes using the BLAST program [62]. The BLAST results were then processed to  
427 categorize candidate PHAS loci into three groups: PHAS loci shared by wild and cultivated  
428 tomatoes, specific to wild tomato, and specific to cultivated tomato.

429

#### 430 ***Identification and analysis of 24-nt hc-siRNA hotspots***

431 Cleaned sRNA reads from all 159 samples were fed into ShortStack [55] to identify siRNA hotspot  
432 regions that were defined by continuously covered sRNAs. The expression of 24-nt siRNA was  
433 calculated by counting the number of 24-nt siRNA reads mapped to the corresponding regions.  
434 Only a region with no less than ten mapped 24-nt siRNA reads was considered as a 24-nt siRNA  
435 hotspot. The 24-nt siRNA expression was normalized to number of reads per kilobase of region  
436 per million mapped reads (RPKM), based on all mapped reads.

437 To identify SV-related 24-nt siRNAs, pairwise comparisons were firstly applied between  
438 stages or between tissues, and statistical analysis was performed using DESeq2 [57]. Only regions

439 with adjust P-values  $< 0.05$  and fold change  $\geq 2$  were considered as significantly changed hotspots.  
440 The significantly changed protein-coding genes and corresponding changed 24-nt siRNA hotspots  
441 in promoter regions were treated as genes pairs involved in epigenetic regulation. To further  
442 exclude potential false positive candidates, we only kept the pairs of 24-nt hotspots and the  
443 corresponding protein-coding genes with a negative correlation in expression that occurred in at  
444 least 10 samples. Previously reported SVs [5] that overlapped with significantly changed 24-nt  
445 siRNA hotspots were then identified. The identified SVs were further filtered to keep those in  
446 promoter regions of protein-coding genes that exhibited an opposite expression pattern compared  
447 to the changes in abundance of the corresponding 24-nt siRNA hotspots.

448

#### 449 ***RNA-Seq read processing and differential expression***

450 Single-end RNA-Seq reads were processed to remove adapters as well as low-quality bases using  
451 Trimmomatic [63], and the trimmed reads shorter than 80 bp were discarded. The remaining high-  
452 quality reads were subjected to rRNA sequence removal by aligning them to an rRNA database  
453 [53] using Bowtie [54] allowing up to three mismatches. The cleaned RNA-Seq reads were aligned  
454 to the cultivated tomato (Heinz 1706, SL4.0) reference genome using STAR [64] allowing up to  
455 two mismatches. Gene expression was measured by counting the number of reads mapped to gene  
456 regions (ITAG4.1), and then normalized to the number of reads per kilobase of exon per million  
457 mapped reads (RPKM). Differential expression analysis was performed using DESeq2 [57]. To  
458 obtain a global comparison among all samples, in particular to identify differentially expressed  
459 genes in specific accessions or developmental stages, we followed a previously described linear  
460 factorial modeling [65]. We also performed pairwise comparisons to identify differentially  
461 expressed genes between stages for different accessions. Genes with adjusted P values  $< 0.05$  and  
462 fold changes no less than two were considered differentially expressed.

463

#### 464 **Accession numbers**

465 Raw sRNA and RNA-Seq reads have been deposited in the NCBI SRA under the accession number  
466 SRP135718.

467

#### 468 **Acknowledgements**

469 This work was supported by grants from the US National Science Foundation (IOS-1564366 to  
470 EvdK and YW and IOS-1855585 to ZF), the Urban Agriculture Characteristic Platform  
471 Construction of Beijing University of Agriculture (5076016177/003 to YZ). This work is dedicated  
472 to the late Prof. Biao Ding (Ohio State University), who participated at the inception stage of this  
473 study.

474

#### 475 **Author contributions**

476 YZ, EvdK, YW, and ZF conceived the idea. YZ, YW, and ZF supervised the study. SM and YW  
477 performed the plant analyses and sampling. YW constructed sRNA-Seq libraries. YQ, YZ, HNS,  
478 XW, XZ, YW, and ZF analyzed the data. YZ and YW summarized the results. YZ, EvdK, YW,  
479 and ZF wrote and revised the manuscript. All authors have read and approved the final manuscript.

480

#### 481 **Competing interests**

482 The authors declare no competing interests.

483



484 **References**

- 485 1. Blanca J, Montero-Pau J, Sauvage C, Bauchet G, Illa E, Diez MJ, Francis D, Causse M, van der  
486 Knaap E, Canizares J: **Genomic variation in tomato, from wild ancestors to contemporary**  
487 **breeding accessions.** *BMC Genomics* 2015, **16**:257.
- 488 2. Blanca J, Canizares J, Cordero L, Pascual L, Diez MJ, Nuez F: **Variation revealed by SNP**  
489 **genotyping and morphology provides insight into the origin of the tomato.** *PLoS One* 2012,  
490 **7**:e48198.
- 491 3. Razifard H, Ramos A, Della Valle AL, Bodary C, Goetz E, Manser EJ, Li X, Zhang L, Visa S,  
492 Tieman D, et al: **Genomic Evidence for Complex Domestication History of the Cultivated**  
493 **Tomato in Latin America.** *Mol Biol Evol* 2020, **37**:1118-1132.
- 494 4. Zhu G, Wang S, Huang Z, Zhang S, Liao Q, Zhang C, Lin T, Qin M, Peng M, Yang C, et al:  
495 **Rewiring of the Fruit Metabolome in Tomato Breeding.** *Cell* 2018, **172**:249-261 e212.
- 496 5. Wang X, Gao L, Jiao C, Stravoravdis S, Hosmani PS, Saha S, Zhang J, Mainiero S, Strickler SR,  
497 Catala C, et al: **Genome of *Solanum pimpinellifolium* provides insights into structural variants**  
498 **during tomato breeding.** *Nat Commun* 2020, **11**:5817.
- 499 6. Alonge M, Wang X, Benoit M, Soyk S, Pereira L, Zhang L, Suresh H, Ramakrishnan S, Maumus  
500 F, Ciren D, et al: **Major Impacts of Widespread Structural Variation on Gene Expression and**  
501 **Crop Improvement in Tomato.** *Cell* 2020, **182**:145-161 e123.
- 502 7. Axtell MJ: **Classification and comparison of small RNAs from plants.** *Annu Rev Plant Biol*  
503 2013, **64**:137-159.
- 504 8. Borges F, Martienssen RA: **The expanding world of small RNAs in plants.** *Nat Rev Mol Cell*  
505 *Biol* 2015, **16**:727-741.
- 506 9. Vazquez F: **Arabidopsis endogenous small RNAs: highways and byways.** *Trends in plant*  
507 *science* 2006, **11**:460-468.
- 508 10. Baulcombe D: **RNA silencing in plants.** *Nature* 2004, **431**:356-363.
- 509 11. Bartel DP: **MicroRNAs: target recognition and regulatory functions.** *Cell* 2009, **136**:215-233.
- 510 12. Chavez Montes RA, de Fatima Rosas-Cardenas F, De Paoli E, Accerbi M, Rymarquis LA,  
511 Mahalingam G, Marsch-Martinez N, Meyers BC, Green PJ, de Folter S: **Sample sequencing of**  
512 **vascular plants demonstrates widespread conservation and divergence of microRNAs.** *Nat*  
513 *Commun* 2014, **5**:3722.
- 514 13. Zheng Y, Wang Y, Wu J, Ding B, Fei Z: **A dynamic evolutionary and functional landscape of**  
515 **plant phased small interfering RNAs.** *BMC Biol* 2015, **13**:32.
- 516 14. Cuperus JT, Fahlgren N, Carrington JC: **Evolution and functional diversification of MIRNA**  
517 **genes.** *The Plant cell* 2011, **23**:431-442.
- 518 15. Ma Z, Coruh C, Axtell MJ: **Arabidopsis lyrata small RNAs: transient MIRNA and small**  
519 **interfering RNA loci within the Arabidopsis genus.** *Plant Cell* 2010, **22**:1090-1103.
- 520 16. Baldrich P, Bélanger S, Kong S, Pokhrel S, Tamim S, Teng C, Schiebout C, Ranjan Gurazada SG,  
521 Gupta P, Patel P, et al: **The Evolutionary History of Small RNAs in the Solanaceae.** *bioRxiv*  
522 2021:2021.2005.2026.445884.
- 523 17. Lunardon A, Johnson NR, Hagerott E, Phifer T, Polydore S, Coruh C, Axtell MJ: **Integrated**  
524 **annotations and analyses of small RNA-producing loci from 47 diverse plants.** *Genome Res*  
525 2020, **30**:497-513.
- 526 18. Blanca J, Sanchez-Matarredona D, Ziarsolo P, Montero-Pau J, van der Knaap E, Díez MJ,  
527 Cañizares J: **Haplotype analyses reveal novel insights into tomato history and domestication**  
528 **including long-distance migrations and latitudinal adaptations.** *bioRxiv*  
529 2021:2021.2006.2018.448912.
- 530 19. Zhong S, Fei Z, Chen YR, Zheng Y, Huang M, Vrebalov J, McQuinn R, Gapper N, Liu B, Xiang  
531 J, et al: **Single-base resolution methylomes of tomato fruit development reveal epigenome**  
532 **modifications associated with ripening.** *Nat Biotechnol* 2013, **31**:154-159.



- 533 20. Karlova R, van Haarst JC, Maliepaard C, van de Geest H, Bovy AG, Lammers M, Angenent GC,  
534 de Maagd RA: **Identification of microRNA targets in tomato fruit development using high-**  
535 **throughput sequencing and degradome analysis.** *J Exp Bot* 2013, **64**:1863-1878.
- 536 21. Pereira L, Sapkota M, Alonge M, Zheng Y, Zhang Y, Razifard H, Taitano NK, Schatz MC, Fernie  
537 AR, Wang Y, et al: **Natural Genetic Diversity in Tomato Flavor Genes.** *Front Plant Sci* 2021,  
538 **12**:642828.
- 539 22. Li B, Yadav RK, Jeong GS, Kim HR, Chae HJ: **The characteristics of Bax inhibitor-1 and its**  
540 **related diseases.** *Curr Mol Med* 2014, **14**:603-615.
- 541 23. Xu G, Wang S, Han S, Xie K, Wang Y, Li J, Liu Y: **Plant Bax Inhibitor-1 interacts with ATG6**  
542 **to regulate autophagy and programmed cell death.** *Autophagy* 2017, **13**:1161-1175.
- 543 24. Chae HJ, Ke N, Kim HR, Chen S, Godzik A, Dickman M, Reed JC: **Evolutionarily conserved**  
544 **cytoprotection provided by Bax Inhibitor-1 homologs from animals, plants, and yeast.** *Gene*  
545 2003, **323**:101-113.
- 546 25. Lu PP, Yu TF, Zheng WJ, Chen M, Zhou YB, Chen J, Ma YZ, Xi YJ, Xu ZS: **The Wheat Bax**  
547 **Inhibitor-1 Protein Interacts with an Aquaporin TaPIP1 and Enhances Disease Resistance in**  
548 **Arabidopsis.** *Front Plant Sci* 2018, **9**:20.
- 549 26. Hernandez-Lopez A, Diaz M, Rodriguez-Lopez J, Guillen G, Sanchez F, Diaz-Camino C:  
550 **Uncovering Bax inhibitor-1 dual role in the legume-rhizobia symbiosis in common bean roots.**  
551 *J Exp Bot* 2019, **70**:1049-1061.
- 552 27. Scotton DC, Azevedo MDS, Sestari I, Da Silva JS, Souza LA, Peres LEP, Leal GA, Jr., Figueira  
553 A: **Expression of the Theobroma cacao Bax-inhibitor-1 gene in tomato reduces infection by**  
554 **the hemibiotrophic pathogen Moniliophthora perniciosa.** *Mol Plant Pathol* 2017, **18**:1101-  
555 1112.
- 556 28. Fei Q, Xia R, Meyers BC: **Phased, secondary, small interfering RNAs in posttranscriptional**  
557 **regulatory networks.** *Plant Cell* 2013, **25**:2400-2415.
- 558 29. Jiang P, Lian B, Liu C, Fu Z, Shen Y, Cheng Z, Qi Y: **21-nt phasiRNAs direct target mRNA**  
559 **cleavage in rice male germ cells.** *Nat Commun* 2020, **11**:5191.
- 560 30. Pokhrel S, Huang K, Meyers BC: **Conserved and non-conserved triggers of 24-nucleotide**  
561 **reproductive phasiRNAs in eudicots.** *Plant J* 2021.
- 562 31. Zhang YC, Lei MQ, Zhou YF, Yang YW, Lian JP, Yu Y, Feng YZ, Zhou KR, He RR, He H, et al:  
563 **Reproductive phasiRNAs regulate reprogramming of gene expression and meiotic**  
564 **progression in rice.** *Nat Commun* 2020, **11**:6031.
- 565 32. Xia R, Meyers BC, Liu Z, Beers EP, Ye S, Liu Z: **MicroRNA superfamilies descended from**  
566 **miR390 and their roles in secondary small interfering RNA Biogenesis in Eudicots.** *Plant Cell*  
567 2013, **25**:1555-1572.
- 568 33. Canto-Pastor A, Santos B, Valli AA, Summers W, Schornack S, Baulcombe DC: **Enhanced**  
569 **resistance to bacterial and oomycete pathogens by short tandem target mimic RNAs in**  
570 **tomato.** *Proc Natl Acad Sci U S A* 2019, **116**:2755-2760.
- 571 34. Moxon S, Jing R, Szittyá G, Schwach F, Rusholme Pilcher R, Moulton V, Dalmay T: **Deep**  
572 **sequencing of tomato short RNAs identifies microRNAs targeting genes involved in fruit**  
573 **ripening.** *Genome Research* 2008, **18**:1602.
- 574 35. Wang Y, Itaya A, Zhong X, Wu Y, Zhang J, van der Knaap E, Olmstead R, Qi Y, Ding B: **Function**  
575 **and evolution of a MicroRNA that regulates a Ca<sup>2+</sup>-ATPase and triggers the formation of**  
576 **phased small interfering RNAs in tomato reproductive growth.** *Plant Cell* 2011, **23**:3185-3203.
- 577 36. Axtell MJ, Meyers BC: **Revisiting Criteria for Plant MicroRNA Annotation in the Era of Big**  
578 **Data.** *Plant Cell* 2018, **30**:272-284.
- 579 37. Moxon S, Jing R, Szittyá G, Schwach F, Rusholme Pilcher RL, Moulton V, Dalmay T: **Deep**  
580 **sequencing of tomato short RNAs identifies microRNAs targeting genes involved in fruit**  
581 **ripening.** *Genome Res* 2008, **18**:1602-1609.
- 582 38. Tomato Genome C: **The tomato genome sequence provides insights into fleshy fruit evolution.**  
583 *Nature* 2012, **485**:635-641.

- 584 39. Zheng Y, Ding B, Fei Z, Wang Y: **Comprehensive transcriptome analyses reveal tomato plant**  
585 **responses to tobacco rattle virus-based gene silencing vectors.** *Sci Rep* 2017, **7**:9771.
- 586 40. Zheng Y, Wang Y, Ding B, Fei Z: **Comprehensive transcriptome analyses reveal that potato**  
587 **spindle tuber viroid triggers genome-wide changes in alternative splicing, inducible trans-**  
588 **acting activity of phasiRNAs and immune responses.** *J Virol* 2017.
- 589 41. Pan C, Ye L, Zheng Y, Wang Y, Yang D, Liu X, Chen L, Zhang Y, Fei Z, Lu G: **Identification**  
590 **and expression profiling of microRNAs involved in the stigma exertion under high-**  
591 **temperature stress in tomato.** *BMC Genomics* 2017, **18**:843.
- 592 42. Cuperus JT, Fahlgren N, Carrington JC: **Evolution and functional diversification of MIRNA**  
593 **genes.** *Plant Cell* 2011, **23**:431-442.
- 594 43. Rehmsmeier M, Steffen P, Hochsmann M, Giegerich R: **Fast and effective prediction of**  
595 **microRNA/target duplexes.** *RNA* 2004, **10**:1507-1517.
- 596 44. Huang S, Zhou J, Gao L, Tang Y: **Plant miR397 and its functions.** *Funct Plant Biol* 2021, **48**:361-  
597 370.
- 598 45. Xia R, Xu J, Meyers BC: **The Emergence, Evolution, and Diversification of the miR390-TAS3-**  
599 **ARF Pathway in Land Plants.** *Plant Cell* 2017, **29**:1232-1247.
- 600 46. Millar AA, Lohe A, Wong G: **Biology and Function of miR159 in Plants.** *Plants (Basel)* 2019,  
601 **8**.
- 602 47. Huijser P, Schmid M: **The control of developmental phase transitions in plants.** *Development*  
603 2011, **138**:4117-4129.
- 604 48. Lian H, Wang L, Ma N, Zhou CM, Han L, Zhang TQ, Wang JW: **Redundant and specific roles**  
605 **of individual MIR172 genes in plant development.** *PLoS Biol* 2021, **19**:e3001044.
- 606 49. O'Maoileidigh DS, van Driel AD, Singh A, Sang Q, Le Bec N, Vincent C, de Olalla EBG,  
607 Vayssières A, Romera Branchat M, Severing E, et al: **Systematic analyses of the MIR172 family**  
608 **members of Arabidopsis define their distinct roles in regulation of APETALA2 during floral**  
609 **transition.** *PLoS Biol* 2021, **19**:e3001043.
- 610 50. Chen YR, Zheng Y, Liu B, Zhong S, Giovannoni J, Fei Z: **A cost-effective method for Illumina**  
611 **small RNA-Seq library preparation using T4 RNA ligase 1 adenylated adapters.** *Plant*  
612 *Methods* 2012, **8**:41.
- 613 51. Zhong S, Joung JG, Zheng Y, Chen YR, Liu B, Shao Y, Xiang JZ, Fei Z, Giovannoni JJ: **High-**  
614 **throughput illumina strand-specific RNA sequencing library preparation.** *Cold Spring Harb*  
615 *Protoc* 2011, **2011**:940-949.
- 616 52. Zheng Y, Gao S, Padmanabhan C, Li R, Galvez M, Gutierrez D, Fuentes S, Ling KS, Kreuze J, Fei  
617 Z: **VirusDetect: An automated pipeline for efficient virus discovery using deep sequencing of**  
618 **small RNAs.** *Virology* 2017, **500**:130-138.
- 619 53. Quast C, Pruesse E, Yilmaz P, Gerken J, Schweer T, Yarza P, Peplies J, Glockner FO: **The SILVA**  
620 **ribosomal RNA gene database project: improved data processing and web-based tools.**  
621 *Nucleic Acids Res* 2013, **41**:D590-596.
- 622 54. Langmead B, Trapnell C, Pop M, Salzberg SL: **Ultrafast and memory-efficient alignment of**  
623 **short DNA sequences to the human genome.** *Genome Biol* 2009, **10**:R25.
- 624 55. Axtell MJ: **ShortStack: comprehensive annotation and quantification of small RNA genes.**  
625 *RNA* 2013, **19**:740-751.
- 626 56. Kozomara A, Griffiths-Jones S: **miRBase: annotating high confidence microRNAs using deep**  
627 **sequencing data.** *Nucleic Acids Res* 2014, **42**:D68-73.
- 628 57. Love MI, Huber W, Anders S: **Moderated estimation of fold change and dispersion for RNA-**  
629 **seq data with DESeq2.** *Genome Biol* 2014, **15**:550.
- 630 58. Huber W, Carey VJ, Gentleman R, Anders S, Carlson M, Carvalho BS, Bravo HC, Davis S, Gatto  
631 L, Girke T, et al: **Orchestrating high-throughput genomic analysis with Bioconductor.** *Nat*  
632 *Methods* 2015, **12**:115-121.
- 633 59. Fahlgren N, Carrington JC: **miRNA Target Prediction in Plants.** *Methods Mol Biol* 2010, **592**:51-  
634 57.

- 635 60. Boyle EI, Weng S, Gollub J, Jin H, Botstein D, Cherry JM, Sherlock G: **GO::TermFinder--open**  
636 **source software for accessing Gene Ontology information and finding significantly enriched**  
637 **Gene Ontology terms associated with a list of genes.** *Bioinformatics* 2004, **20**:3710-3715.
- 638 61. De Paoli E, Dorantes-Acosta A, Zhai J, Accerbi M, Jeong DH, Park S, Meyers BC, Jorgensen RA,  
639 Green PJ: **Distinct extremely abundant siRNAs associated with cosuppression in petunia.** *RNA*  
640 2009, **15**:1965-1970.
- 641 62. Camacho C, Coulouris G, Avagyan V, Ma N, Papadopoulos J, Bealer K, Madden TL: **BLAST+:**  
642 **architecture and applications.** *BMC Bioinformatics* 2009, **10**:421.
- 643 63. Bolger AM, Lohse M, Usadel B: **Trimmomatic: a flexible trimmer for Illumina sequence data.**  
644 *Bioinformatics* 2014, **30**:2114-2120.
- 645 64. Dobin A, Davis CA, Schlesinger F, Drenkow J, Zaleski C, Jha S, Batut P, Chaisson M, Gingeras  
646 TR: **STAR: ultrafast universal RNA-seq aligner.** *Bioinformatics* 2013, **29**:15-21.
- 647 65. Clevenger J, Chu Y, Arrais Guimaraes L, Maia T, Bertoli D, Leal-Bertoli S, Timper P, Holbrook  
648 CC, Ozias-Akins P: **Gene expression profiling describes the genetic regulation of Meloidogyne**  
649 **arenaria resistance in Arachis hypogaea and reveals a candidate gene for resistance.** *Sci Rep*  
650 2017, **7**:1317.

651

652 **Figure legend**

653 **Figure 1.** Functional analysis of SV-related 24-nt hc-siRNA regions among wild and cultivated  
654 tomatoes. **A.** Circos plot of the densities of 24-nt hc-siRNAs, genes, repeat sequences, and SVs  
655 across the tomato genome. **B.** Differentially expressed genes showing a negative correlation with  
656 the corresponding SV-related 24-nt hc-siRNA clusters in their promoters in at least one pairwise  
657 comparison. YG, young green fruit; MG, mature green fruit; Br, fruit at the breaker stage; RR, red  
658 ripe fruit. **C.** GO term enrichment analysis of differentially expressed genes in **(B)**. **D.** SV-related  
659 24-nt hc-siRNA (Cluster\_71406) enrichment leading to the repression of *Solyc06g084130*  
660 expression in SLL (*Solanum lycopersicum* var. *lycopersicum*) and SLC (*S. lycopersicum* var.  
661 *cerasiforme*) compared to SP (*S. pimpinellifolium*).

662  
663 **Figure 2.** SV-related PHASs. **A.** Distribution of PHAS loci and SV-related PHAD loci across the  
664 12 tomato chromosomes. The number depicts the distinct PHASs at each locus. **B.** SV90890 causes  
665 gain/loss of PHASs and protein-coding genes. **C.** Allele frequency of SV90890 in different tomato  
666 groups. **D.** Abundance of phasiRNAs in the genome region of SLL Heinz 1706 containing  
667 SV90890 in the nine tomato accessions. For each box plot, the lower and upper bounds of the box  
668 indicate the first and third quartiles, respectively, and the center line indicates the median. The  
669 whisker represents 1.5× interquartile range of the lower or upper quartile.

670  
671 **Figure 3.** Distinct expression patterns of miRNAs. For each box plot, the lower and upper bounds  
672 of the box indicate the first and third quartiles, respectively, and the center line indicates the median.  
673 The whisker represents 1.5× interquartile range of the lower or upper quartile.

674  
675 **Figure 4.** MiRNA genes overlapped with SVs. **A.** Synteny diagram of miR10535 gene(s) in SP  
676 and SLL reference genomes. **B.** Enriched GO terms of predicted target genes of SV-related  
677 miRNAs.

678  
679 **Figure 5.** SV affects miRNA expression. **A.** Diagram showing SV49949 (a 17-bp indel) in the  
680 promoter of miR172a/b-2 gene. **B.** Allele frequency of SV49949 in different tomato groups. **C.**  
681 Expression profiles of miR172a/b-2 in different tomato accessions. YG, young green fruits. MG,  
682 mature green fruits. Br, fruits at the breaker stage. RR, red ripe fruits.

683

684 **Figure 6.** Changes in miR397 expression during tomato domestication. **A.** Diagram showing the  
685 six 5P and seven 3P processing variants from the miR397 precursor. **B.** Abundance of each  
686 miR397 variant in different tomato accessions.
